# Supplementary material for: Precise size control of layered double hydroxide nanoparticles through reconstruction using tripodal ligands
Source: Royal Society of Chemistry journal article supplement (doi:10.1039/c8dt02190b), 2018-01-01
Supplement: c8dt02190b1.pdf [file c8dt02190b1.pdf]

## **Electronic Supplementary Information**

### **Precise size control of layered double hydroxide nanoparticles through reconstruction using tripodal ligands**

Yoshiyuki Kuroda,<sup>\*a</sup> Yuya Oka,<sup>b</sup> Tadao Yasuda,<sup>b</sup> Tatsuyuki Koichi,<sup>b</sup> Keisuke Muramatsu,<sup>c</sup> Hiroaki Wada,<sup>b</sup> Atsushi Shimojima<sup>b</sup> and Kazuyuki Kuroda<sup>\*b,d</sup>

<sup>a</sup> Green Hydrogen Research Center, Yokohama National University

79-5 Tokiwadai, Hodogaya-ku, Yokohama 240-8501, Japan.

E-mail: kuroda-yoshiyuki-ph@ynu.ac.jp; Fax: +81-45-339-4024; Tel: +81-45-339-3872

<sup>b</sup> Department of Applied Chemistry, Faculty of Science and Engineering, Waseda University

Okubo 3-4-1, Shinjuku-ku, Tokyo 169-8555, Japan.

E-mail: kuroda@waseda.jp; Fax: +81-3-5286-3199; Tel: +81-3-5286-3199

<sup>c</sup> Department of Advanced Science and Engineering, Faculty of Science and Engineering, Waseda University

3-4-1 Okubo, Shinjuku-ku, Tokyo 169-8555, Japan.

<sup>d</sup> Kagami Memorial Research Institute for Materials Science and Technology

2-8-26 Nishiwaseda, Shinjuku-ku, Tokyo 169-0051, Japan.

### Theoretical Surface Area of an LDH sheet

Consider about an LDH sheet with unit cell size in lateral directions and the composition of  $\text{Mg}_{0.667}\text{Al}_{0.333}(\text{OH})_2 \cdot 0.167\text{CO}_3$ . Interlayer water is ignored because BET surface area is measured for its dried state. The surface area on both top and bottom surfaces of a unit-cell-size sheet is  $\sqrt{3}a^2 = 0.161 \times 10^{-18} \text{ m}^2$ , where  $a = 0.305 \text{ nm}$ . The mass of a unit-cell-size sheet is

$$\begin{aligned} & \{24.31 \times 0.667 + 26.98 \times 0.333 + 16.00 \times (2 + 0.167 \\ & \times 3) + 1.008 \times 2 + 12.01 \times 0.167\} / (6.02 \times 10^{23}) \\ & = 11.50 \times 10^{-23} \text{ g.} \end{aligned}$$

The theoretical surface area is

$$(0.161 \times 10^{-18}) / (11.50 \times 10^{-23}) = 1400 \text{ m}^2/\text{g}$$

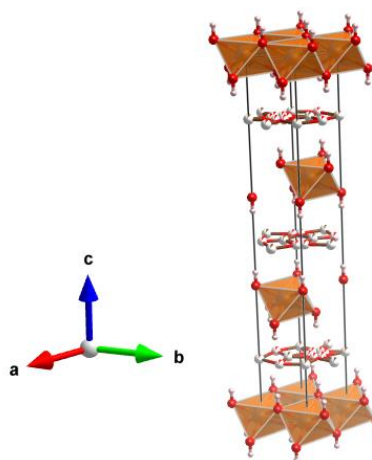

Unit cell image of an LDH.

**Table S1.** FWHM of diffraction peaks of LDHNPs regrown in dilute THAM solutions.

| [THAM]/M       | FWHM of 003 peaks/deg | FWHM of 110 peaks/deg |
|----------------|-----------------------|-----------------------|
| as-synthesized | 1.24                  | 1.22                  |
| 0.25           | 1.58                  | 1.22                  |
| 0.10           | 1.39                  | 0.98                  |
| 0              | 0.50                  | 0.48                  |

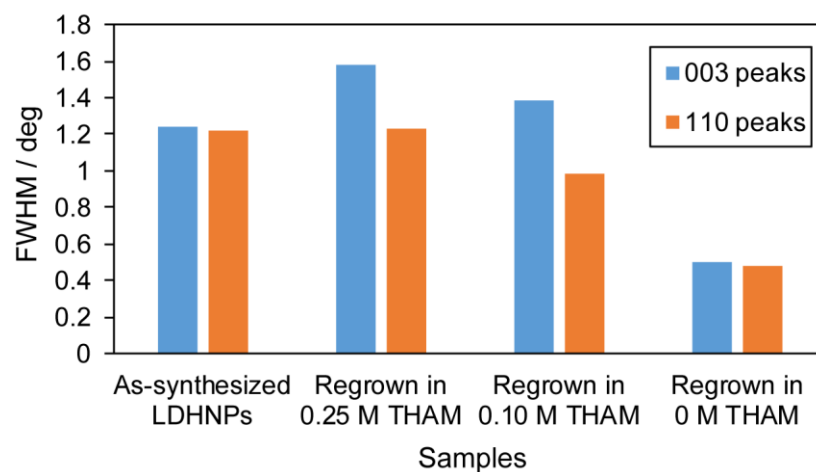

**Fig. S1.** FWHM of the diffraction peaks of LDHNPs regrown in dilute THAM solutions.

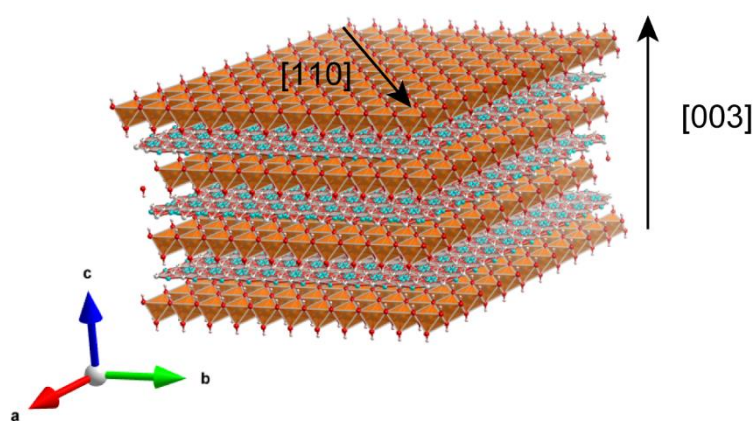

**Fig. S2.** Structural model of an LDH.

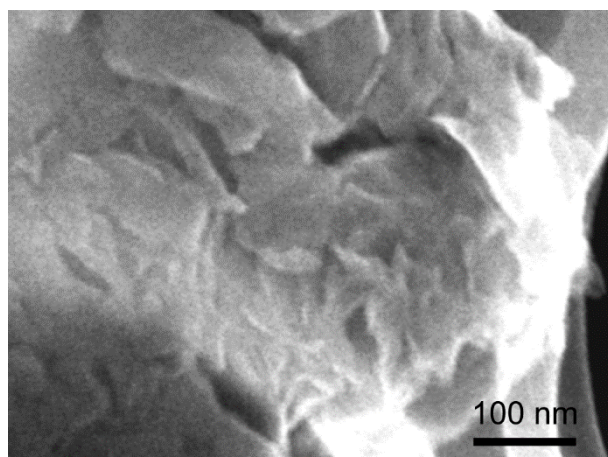

**Fig. S3.** SEM image of RLDH-1.0 without an ultrasonic treatment.

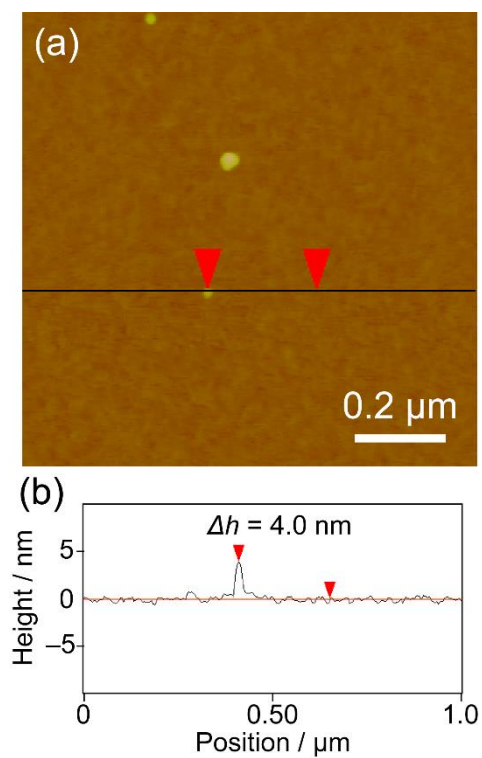

**Fig. S4.** (a) AFM image of RLDH-1.0. (b) The height profile on the line indicated in (a).

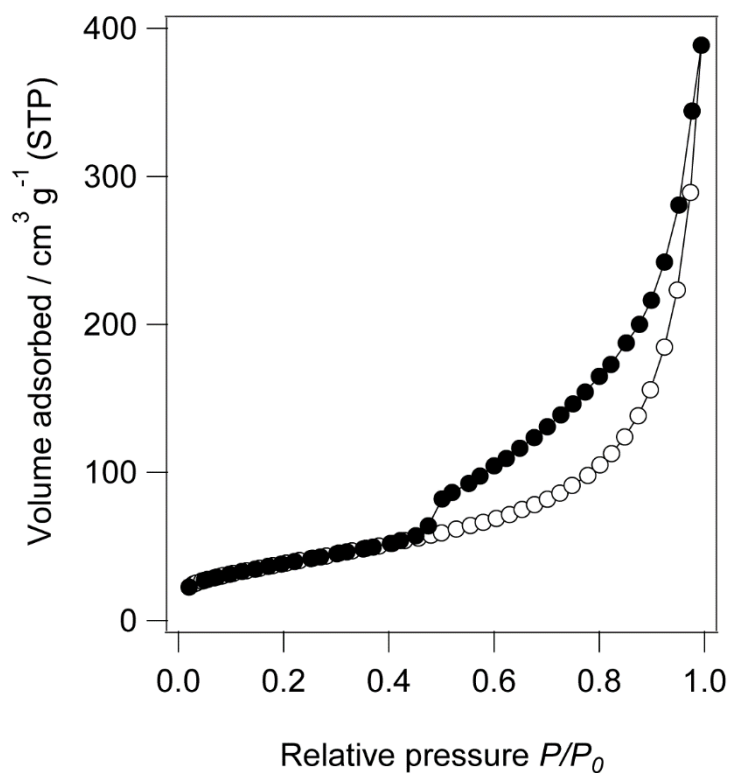

**Fig. S5.** N<sub>2</sub> adsorption–desorption isotherm of RLDH-1.0 without ultrasonic treatment.

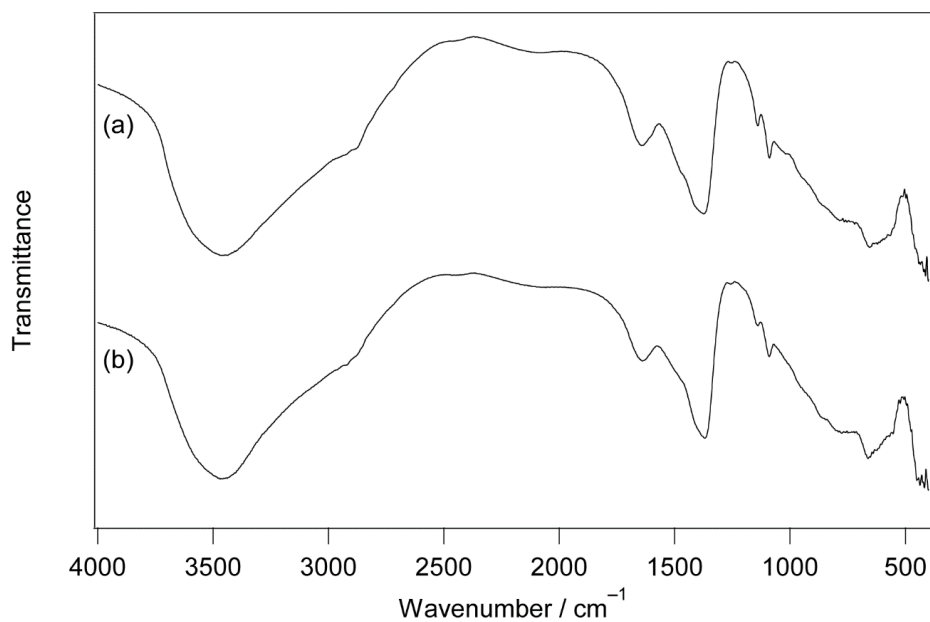

**Fig. S6.** FTIR spectra of (a) LDHNPs synthesized by the modified coprecipitation, using THAM and (b) those synthesized by the reconstruction method using THAM. No significant differences were observed between these spectra.

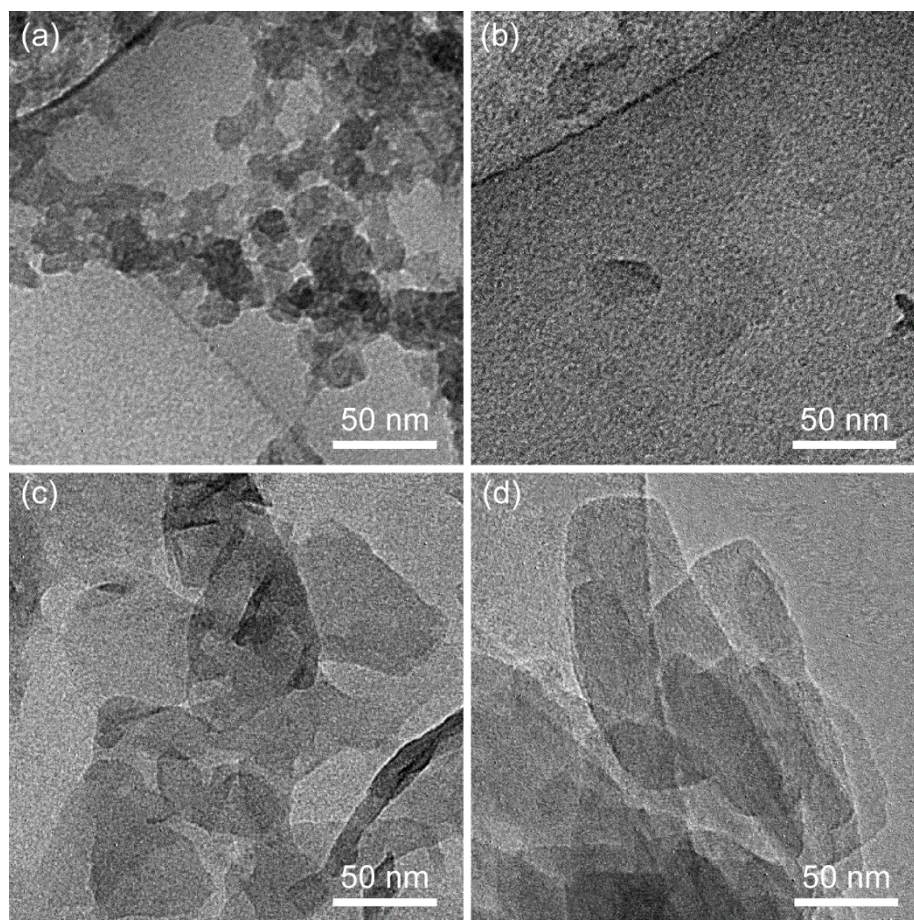

**Fig. S7.** TEM images of (a) RLDH-1.0, (b) RLDH-0.50, (c) RLDH-0.20, and (d) RLDH-0.

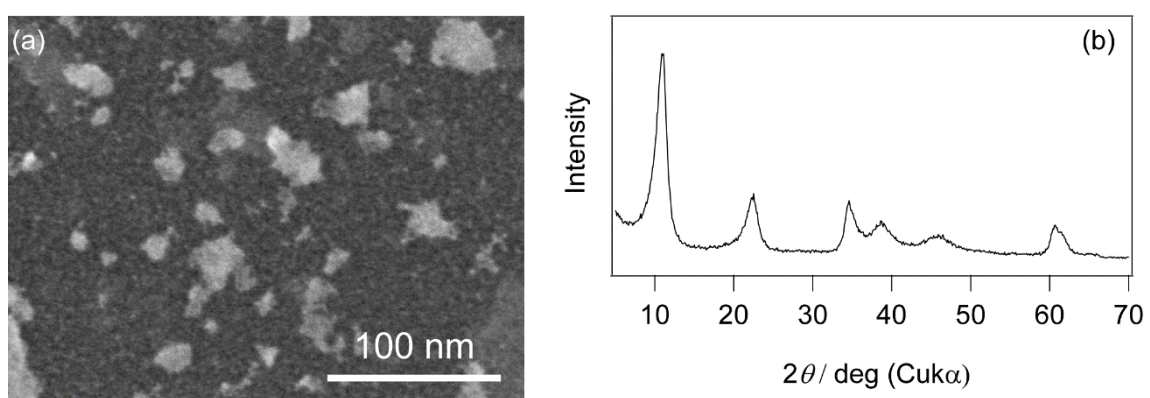

**Fig. S8.** (a) SEM image and (b) XRD pattern of LDHNPs reconstructed from MMO(85)-c by using pentaerythritol as a tripodal ligand.



**Table S2.** FWHM of diffraction peaks of LDHNPs prepared by the reconstruction method.

| Sample                 | FWHM of 003 peaks/deg | FWHM of 110 peaks/deg |
|------------------------|-----------------------|-----------------------|
| Original LDH particles | 0.80                  | 0.49                  |
| RLDH-0                 | 0.70                  | 0.27                  |
| RLDH-1.0               | 1.54                  | 1.28                  |
| RLDH-0.50              | 1.14                  | 0.86                  |
| RLDH-0.20              | 0.99                  | 0.64                  |

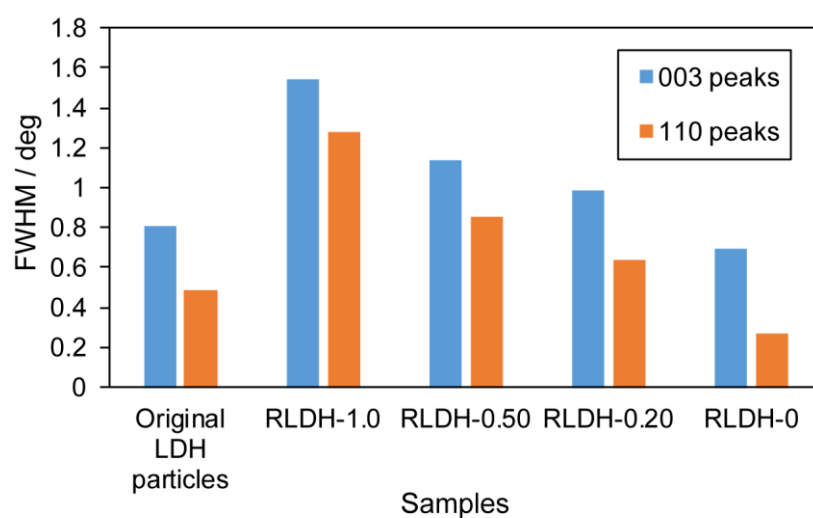

**Fig. S9.** FWHM of the diffraction peaks of LDHNPs prepared by the reconstruction method.

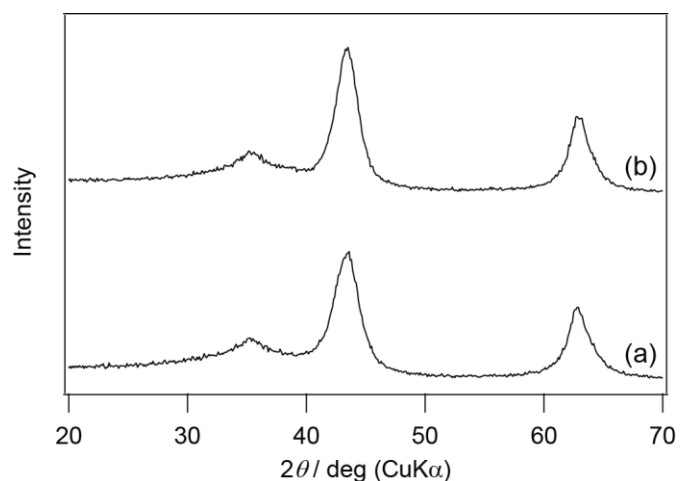

**Fig. S10.** XRD patterns of MMOs calcined at (a) 450 °C and (b) 550 °C.

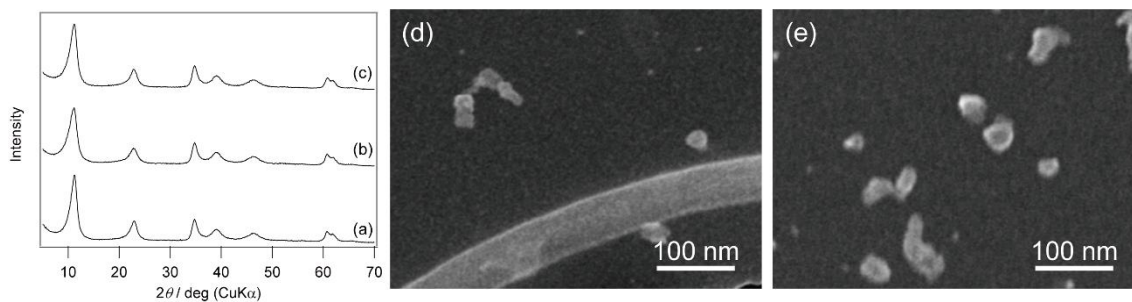

**Fig. S11.** XRD patterns of RLDH-1.0 prepared (a) from MMO calcined at 450 °C without stirring during reconstruction, (b) from MMO calcined at 450 °C with stirring, and (c) from MMO calcined at 550 °C without stirring. SEM images of RLDH-1.0 prepared (d) from MMO calcined at 450 °C with stirring, and (e) from MMO calcined at 550 °C without stirring.
